# Supplementary material for: A Multimodal Score Accurately Classifies Fontan Failure and Late Mortality in Adult Fontan Patients
Source: PubMed Central journal article supplement (PMC8960137; doi:10.3389/fcvm.2022.767503), 2022-03-10
Supplement: Image_2.pdf [file Image_2.pdf]

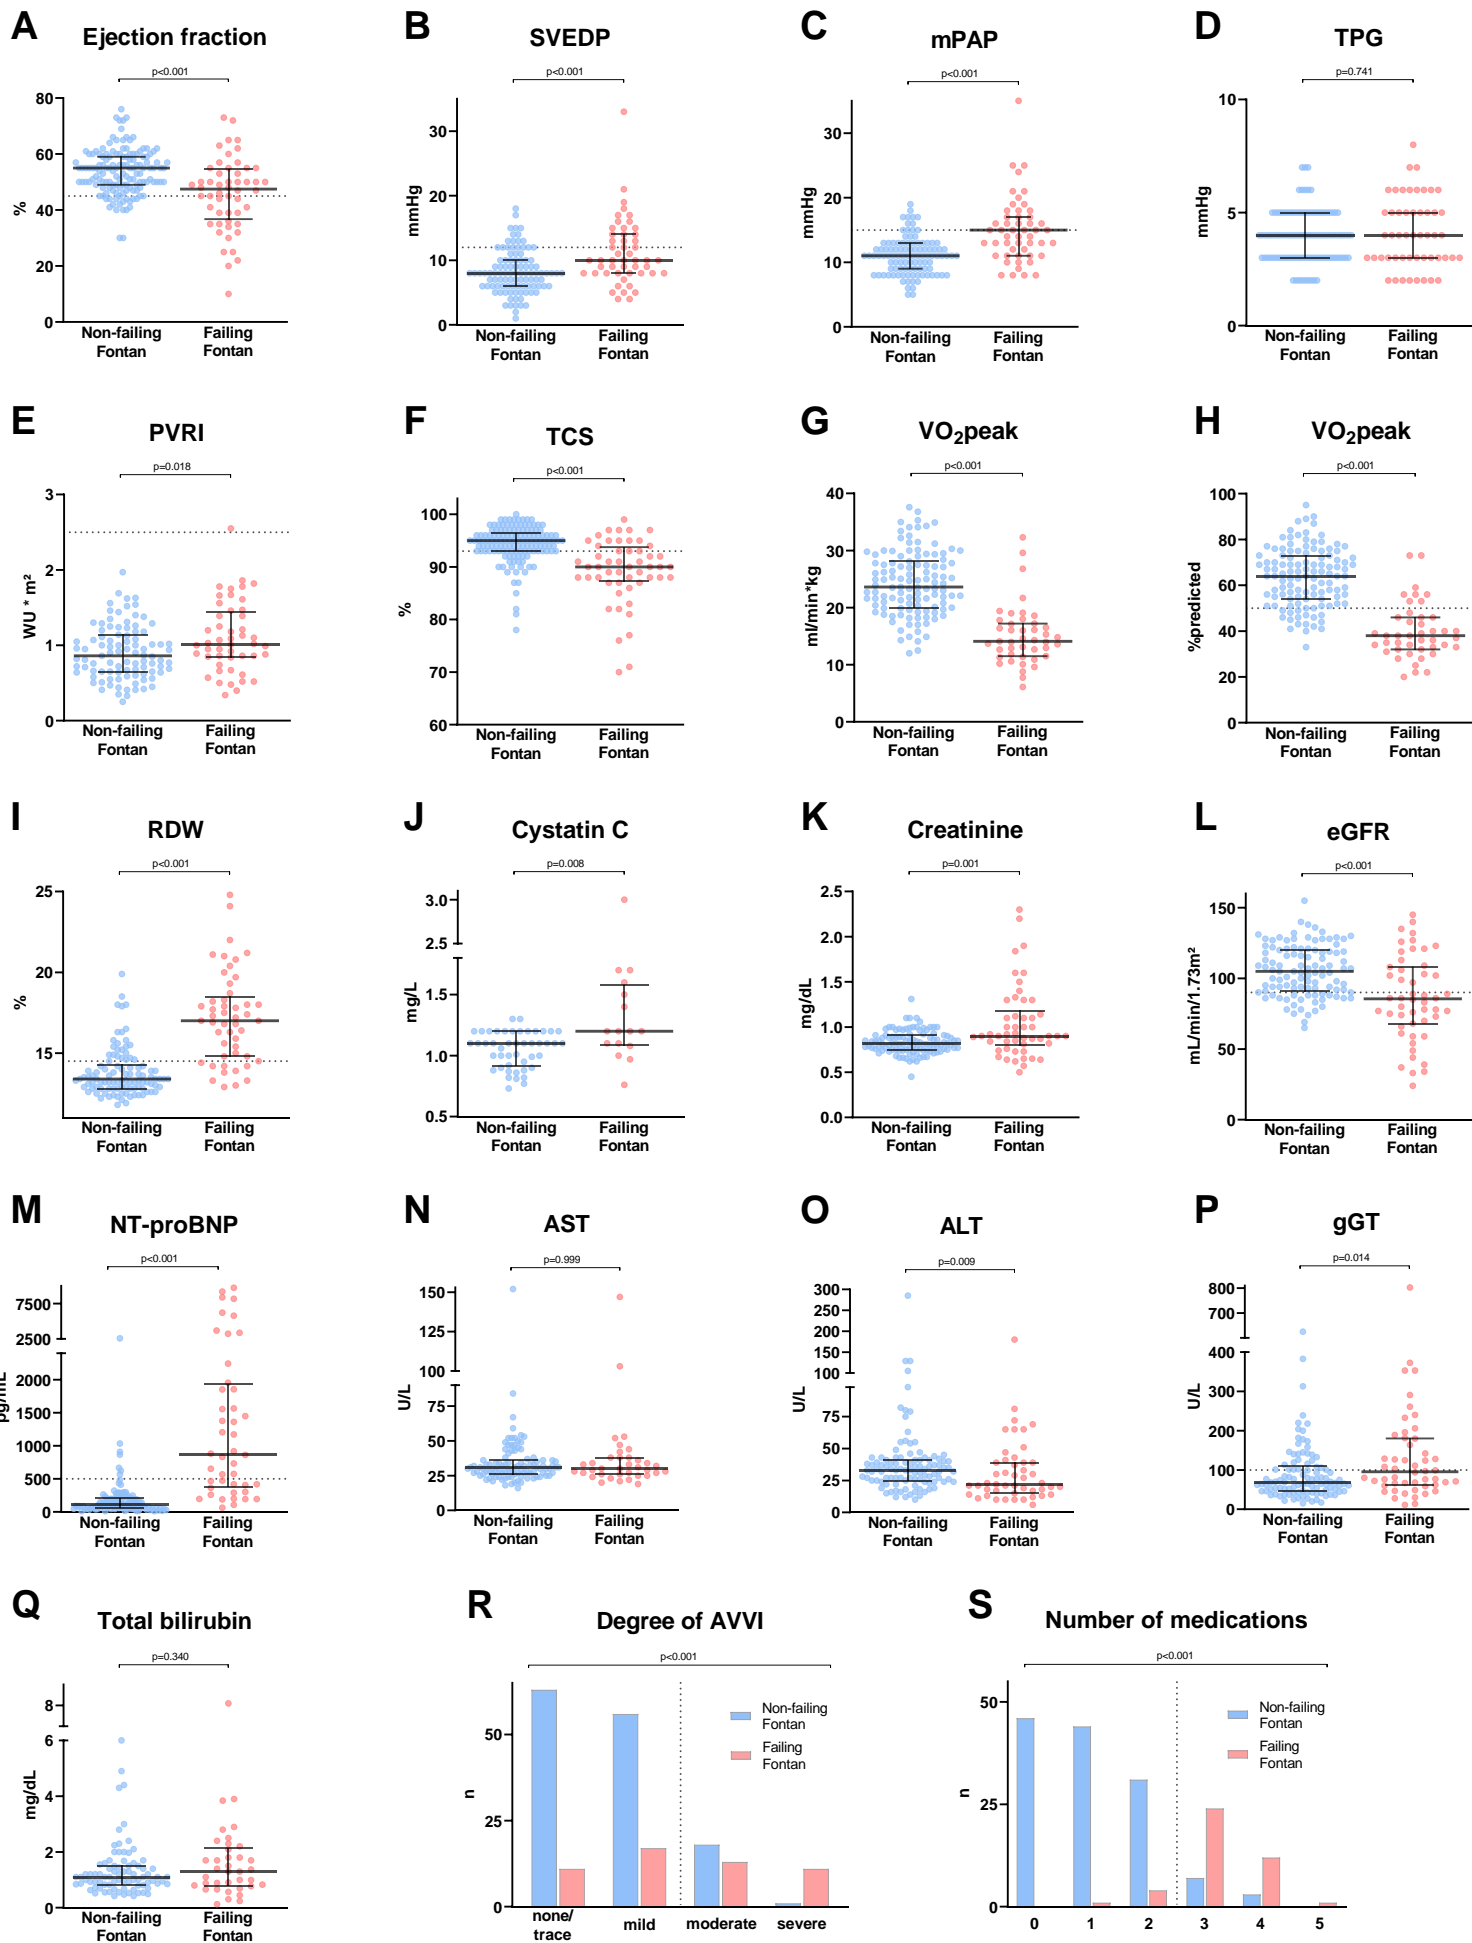

## Supplemental Figure 2

Comparison of variables in failing and non-failing adult Fontan patients (Table 1). Continuous variables (A-Q) are depicted as scatterplots, categorical variables (R-S) as column diagrams. In variables with large ranges, ordinates have been segmented for better visualization; segments were set to graph all data points. A-Q: Dots represent individual data points for non-failing (blue) and failing Fontan patients (red); central lines indicate median and interquartile range. R-S: columns represent frequency of grade of atrioventricular valve incompetence (R) and number of prescribed cardiovascular medications (S) for non-failing (blue) and failing Fontan patients (red). For variables included in the Fontan Failure Score, dichotomizing thresholds are indicated by dotted lines.

ALT - alanine aminotransferase; AST - aspartate aminotransferase; AVVI - atrioventricular valve incompetence; eGFR - estimated glomerular filtration rate; gGT -  $\gamma$ -glutamyl transferase; mPAP - mean pulmonary artery/ Fontan pressure; NT-proBNP - N-terminal pro-brain natriuretic peptide; PVRI - pulmonary vascular resistance index; RDW - red cell distribution width; SVEDP - single ventricular end-diastolic pressure; TCS - transcutaneous oxygen saturation at rest; VO<sub>2</sub>peak - peak oxygen uptake in cardiopulmonary exercise testing; WU - Wood units.
