# Supplementary material for: A Multimodal Score Accurately Classifies Fontan Failure and Late Mortality in Adult Fontan Patients
Source: PubMed Central journal article supplement (PMC8960137; doi:10.3389/fcvm.2022.767503), 2022-03-10
Supplement: Image_3.pdf [file Image_3.pdf]

## NT-proBNP according to Fontan modification

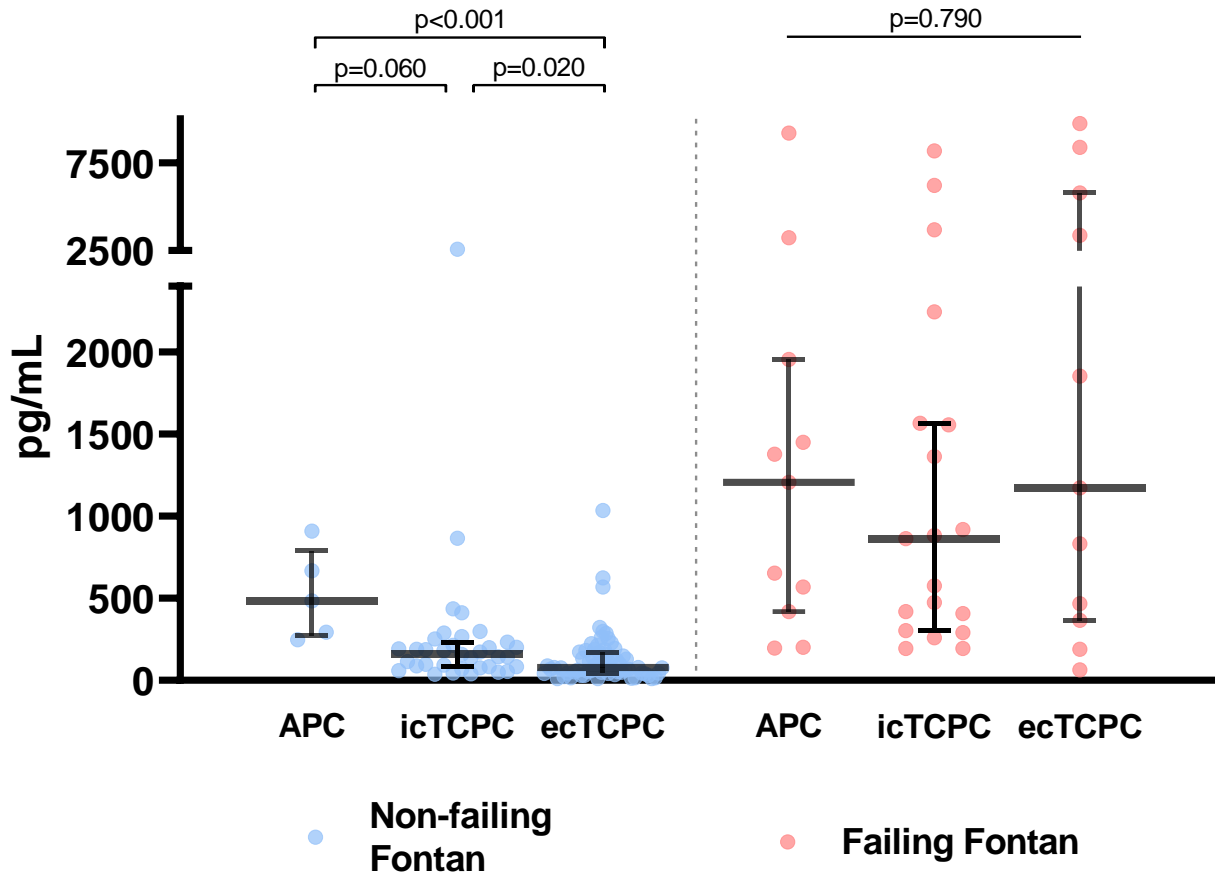

### Supplemental Figure 3

Scatterplot of NT-proBNP levels in non-failing (blue) and failing Fontan patients (red) stratified for Fontan modifications. Central lines indicate median and interquartile range. Ordinate has been segmented for better visualization; segments were set to graph all data points. Data within non-failing / failing Fontan groups were compared by Kruskal-Wallis test with Dunn's multiple comparisons test.

APC- atriopulmonary connection; ecTCPC - extracardiac total cavopulmonary connection; icTCPC - intracardiac total cavopulmonary connection; NT-proBNP - N-terminal pro-brain natriuretic peptide.
